# Supplementary material for: Adsorption of collagen onto single walled carbon nanotubes: a molecular dynamics investigation
Source: Royal Society of Chemistry journal article supplement (doi:10.1039/c1cp20107g), 2011-01-01
Supplement: c1cp20107g.pdf [file c1cp20107g.pdf]

## Supporting information

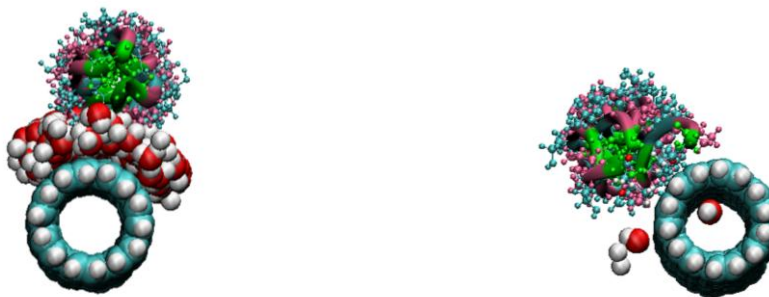

**Fig. S1** GPO-CNT cross section view of initial and final conformation.

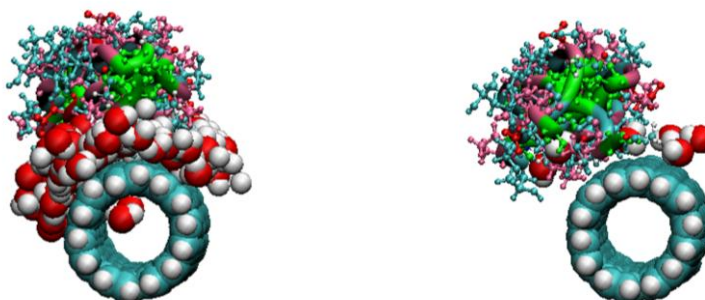

**Fig. S2** GDO-CNT cross section view of initial and final conformation.

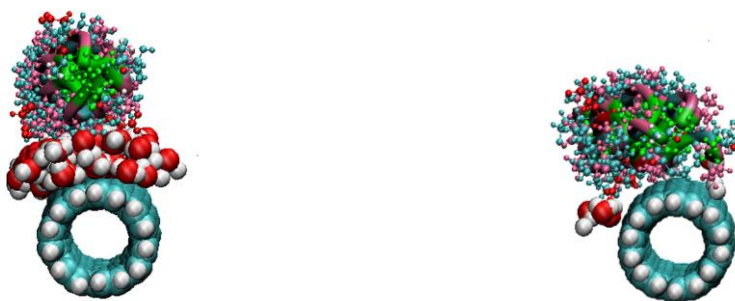

**Fig. S3.** GEO-CNT cross section view of initial and final conformation.

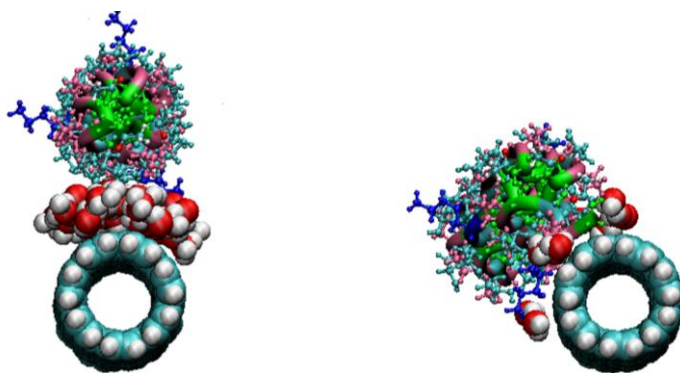

**Fig. S4.** GKO-CNT cross section view of initial and final conformation.

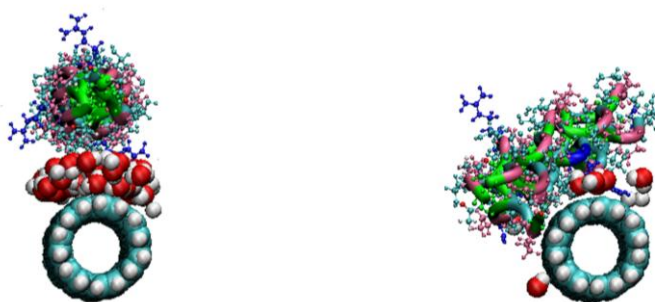

**Fig. S5.** GRO-CNT cross section view of initial and final conformation.

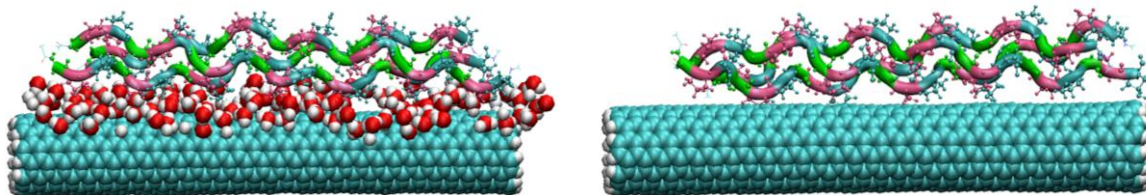

**Fig. S6.** GPO-CNT side view of initial and final conformation.

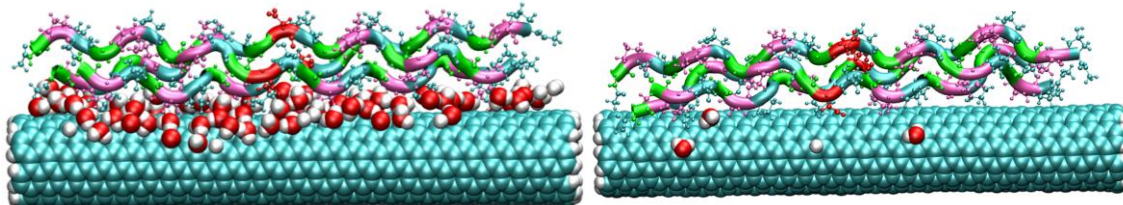

**Fig. S7.** GDO-CNT side view of initial and final conformation.

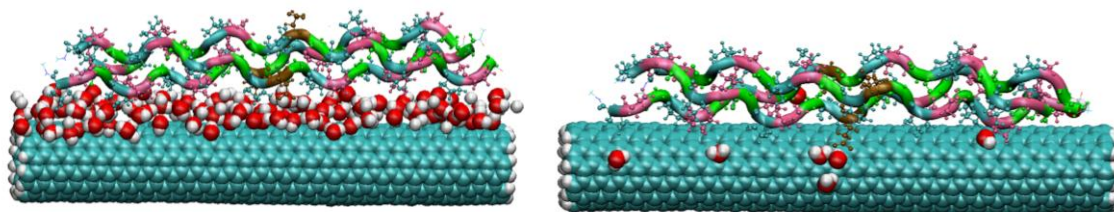

**Fig. S8.** GEO-CNT side view of initial and final confirmation.

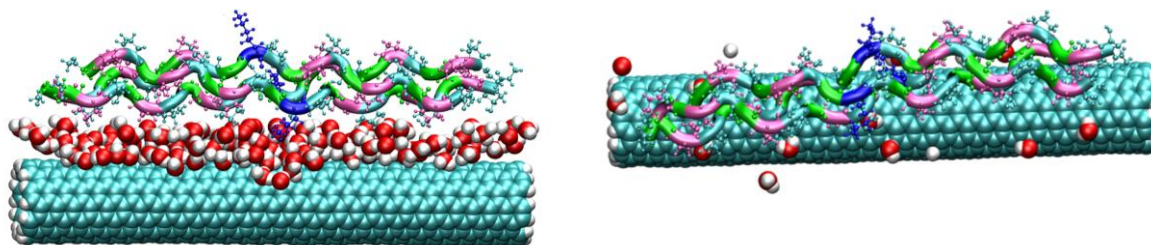

**Fig. S9.** GKO-CNT side view of initial and final confirmation.

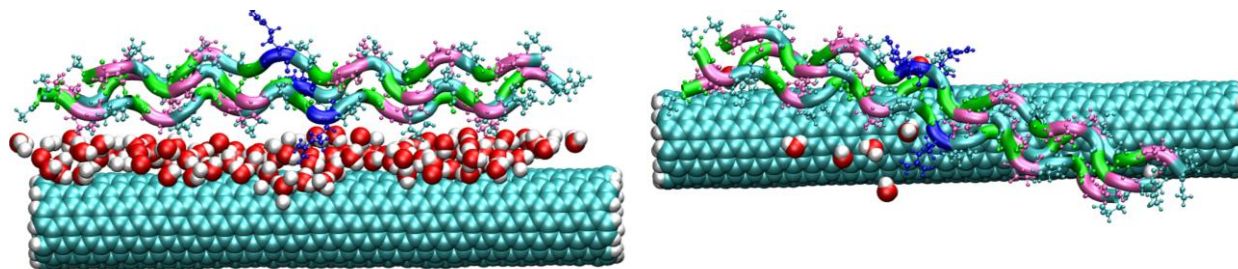

**Fig. S10.** GRO-CNT side view of initial and final confirmation.
